1 **Enterovirus 71 structural viral protein 1 promotes mouse Schwann cell**  
2 **autophagy via endoplasmic reticulum stress-mediated peripheral myelin protein**  
3 **22 upregulation**

4

5 **Running title:** VP1 in autophagy

6

7 Pei-qing LI<sup>1</sup>, Si-da YANG<sup>2\*</sup>, Dan-dan HU<sup>2</sup>, Dan WEI<sup>3</sup>, Jing LU<sup>4</sup>, Huan-ying  
8 ZHENG<sup>4</sup>, Shu-shan NIE<sup>1</sup>, Guang-ming LIU<sup>1</sup>, Hao-mei YANG<sup>1</sup>

9

10 <sup>1</sup>Department of Pediatric Emergency, Guangzhou Women and Children's Medical  
11 Center, Guangzhou Medical University, Guangzhou, Guangdong, China

12 <sup>2</sup>Department of Pediatric Neurology, Guangzhou Women and Children's Medical  
13 Center, Guangzhou Medical University, Guangzhou, China

14 <sup>3</sup>Pediatric Intensive Care Unit, First Affiliated Hospital of Guangxi Medical  
15 University, Nanning, China

16 <sup>4</sup> Guangdong Provincial Institution of Public Health, Guangdong Provincial Center  
17 for Disease Control and Prevention, China

18

19 **\*Corresponding Author**

20 Si-da Yang

21 Department of Pediatric Neurology, Guangzhou Women and Children's Medical  
22 Center, Guangzhou Medical University, Guangzhou, China

23 Tel: +86-13808879852

24 E-mail: yangsida2013@126.com

25

26

27 **Abstract**

28 Enterovirus 71 (EV71) accounts for the majority of hand, foot and mouth disease-  
29 related deaths due to fatal neurological complications. The clinical observations and  
30 animal models found the early invasion of nervous system, and the demyelinating  
31 phenomenon was observed. As one of the receptors of EV71 structural viral protein 1  
32 (VP1), SCARB2 mainly exists on the myelin sheath. EV71 VP1 can promote viral  
33 replication through inducing autophagy in neuron cells. This study aims to investigate  
34 the role and mechanism of VP1 in autophagy of mouse Schwann cells (MSCs). An  
35 EV71 VP1-expressing vector (pEGFP-C3-VP1) was generated and transfected into  
36 MSCs. Transmission electron microscopy (TEM) and Western blot analysis of the  
37 autophagy marker microtubule-associated proteins 1A/1B light chain 3B (LC3B)  
38 were used to assess autophagy in the cells. Real-time PCR and immunofluorescent  
39 staining were performed to determine the expression of PMP22. Small interfering  
40 RNA against PMP22 was employed to investigate the role of PMP22 in MSCs  
41 autophagy. Selective endoplasmic reticulum (ER) stress inhibitor salubrinal (SAL)  
42 was employed to determine whether PMP22 is mediated by ER stress. Our results  
43 demonstrated that VP1 played a promotive role in MSC autophagy. Overexpression of  
44 VP1 upregulated PMP22. PMP22 deficiency downregulated LC3B and thus inhibited  
45 autophagy. Furthermore, PMP22 expression was significantly suppressed by SAL.  
46 VP1 promotes MSC autophagy through upregulating ER stress-mediated PMP22  
47 expression. VP1/ER stress/ PMP22 axis in autophagy may be a potential therapeutic  
48 target for EV71 infection-induced fatal neuronal damage.

49

50 **Key words:** Enterovirus 71 structural viral protein 1; autophagy; endoplasmic  
51 reticulum stress; peripheral myelin protein 22

52 **Introduction**

53 Enterovirus 71, a single-stranded RNA virus, is one of the major causative pathogens  
54 of contagious hand, foot and mouth disease (HFMD)(1, 2) that mainly affects children  
55 under the age of 5. HFMD is an emerging public health issue worldwide, especially in  
56 Asia-Pacific countries(1, 3, 4). Although HFMD is commonly considered as a self-  
57 limited disease characterized by ulcerating vesicles in the mouth and viral rashes on  
58 hands and feet(5-7), a small proportion of cases are severe and even fatal due to  
59 cardiopulmonary or neurological complications(8, 9). EV71 infection accounts for at  
60 least 80% of severe cases and 90% of deaths in China according to the recent data  
61 (10). Increasing evidence indicates that EV71 may target human neurons in central  
62 nervous system (CNS), leading to neuronal degeneration and severe neurological  
63 disorders in fatal cases(11-13). Our previous study also showed that neuronal necrosis  
64 and neuronophagia were present in the brainstem in fatal EV71-infected cases(14).  
65 Despite these neurotropic characteristics of EV71 virus, the pathogenesis and  
66 molecular mechanisms of EV71-induced neuronal damage remain largely unknown.  
67 Autophagy is an intracellular process that is mediated by a unique organelle named  
68 autophagosome and transports cytoplasmic components to the lysosomes for  
69 degradation(15, 16). The alteration of autophagy in the nervous system is associated  
70 with various neurodegenerative and neurometabolic disorders such as Alzheimer's  
71 disease and Niemann-Pick disease(17-19). Autophagy can be observed using  
72 transmission electron microscopy (TEM) and can be assessed by measuring the  
73 conversion of microtubule-associated protein 1 chain 3 (LC3) to  
74 phosphatidylethanolamine (PE)-conjugated LC3 (LC3-II) localized in  
75 autophagosomal membranes, which reflects the number of autophagosomes or the  
76 degree of autophagy(20-22). EV71 has been shown to induce autophagy in infected

77 human rhabdomyosarcoma and neuroblastoma cells(23, 24). Our previous study  
78 demonstrates that EV71 structural viral protein 1 (VP1) also induces autophagy in  
79 cultured primary EV71-infected brainstem neurons, which can be inhibited by  
80 endoplasmic reticulum (ER) stress inhibitor salubrinal (SAL)(25), suggesting an  
81 essential role of ER stress in VP1-induced autophagy.

82 ER stress is triggered by the accumulation of unfolded or misfolded proteins in ER(26,  
83 27). Although the relationship between ER stress and autophagy is not yet fully  
84 understood, it is well established that there is a dynamic crosstalk between these two  
85 systems, and ER stress either stimulates or inhibits autophagy(26, 28, 29). Since ER  
86 stress and autophagy are commonly concurrent in some human pathologies, such as  
87 cardiovascular diseases, cancers, and neurodegenerative disorders(29-31), it is of  
88 great importance to identify ER stress-associated molecules as positive or negative  
89 regulators of autophagy. Peripheral myelin protein 22 (PMP22) is a transmembrane  
90 glycoprotein highly expressed in the myelinating Schwann cells of peripheral neurons,  
91 and majorly contributes to synthesis and function of myelin sheaths(32). In Schwann  
92 cells, newly synthesized PMP22 is transiently retained in ER and Golgi before  
93 transported to the plasma membrane(33, 34). Under pathological conditions,  
94 excessive mature or premature (unfolded or misfolded) PMP22 accumulates in ER  
95 and interacts with calnexin, a  $Ca^{2+}$ -binding chaperone, leading to ER retention and  
96 activation of ER stress(35, 36). However, it remains unknown whether the  
97 relationship between PMP22 and ER stress is associated with autophagy.

98 In this study, we hypothesize that PMP22 is a downstream effector of ER stress and  
99 triggers activation of autophagy in response to EV71 capsid protein VP1. To confirm  
100 this hypothesis, we transfected mouse Schwann cells (MSCs) with VP1-expressing  
101 vectors to explore its effect on MSC autophagy and PMP22 expression. Our results

102 showed that ER stress mediates the expression of PMP22 that is essential for MSC  
103 autophagy, suggesting an involvement of VP1/ER stress/PMP22 axis in the regulation  
104 of MSC autophagy. Targeting VP1/ER stress/PMP22 axis in autophagy may be a  
105 novel therapeutic strategy against EV71 infection-induced neuronal damage.

106

## 107 **Results**

### 108 *Cloning and identification of VP1 cDNA.*

109 To determine if VP1 cDNA was successfully cloned into pEGFP-C3 vector, we  
110 prepared plasmids from transformed bacteria and digested them with *BamHI* and *XhoI*.  
111 The results of agarose electrophoresis showed that a band was located between 750  
112 and 1000 bp following enzymatic digestion (Fig. 1), which is consistent with the size  
113 of VP1 cDNA (894 bp) based on the GenBank database. The sequencing results also  
114 indicated that the cloned fragment was identical to the VP1 cDNA sequence  
115 (supplementary Fig. 1), suggesting that VP1 cDNA was successfully cloned into the  
116 vector without any mutation.

### 117 *Overexpression of VP1 activates MSC autophagy.*

118 To examine whether VP1 has an effect on MSC autophagy, we analyzed the cellular  
119 and subcellular morphology of VP1-overexpressing MSCs using TEM. As shown in  
120 Fig. 2, VP1-overexpressing MSCs exhibited the features of autophagy such as  
121 swelling mitochondria, dilation and degranulation of rough ER, and vesicle-like  
122 dilation of Golgi(37), whereas the organelles in untransfected and GFP-transfected  
123 control MSCs were still morphologically normal. These results suggest that VP1 may  
124 activate autophagy in MSCs.

### 125 *Overexpression of VP1 markedly upregulates PMP22 expression in MSCs*

126 Our previous study indicates an essential role of ER stress in VP1-induced autophagy  
127 in primary cultured EV71-infected brainstem neurons(14). In combination with the  
128 findings that PMP22 is abundant in Schwann cells and is closely associated with ER  
129 stress activation(32, 35, 36), we hypothesize that PMP22 might correlate with VP1  
130 and play an important role in VP1-induced autophagy. To test this hypothesis, we  
131 detected the mRNA and protein expression of PMP22 in VP1-overexpressing MSCs.  
132 As shown in Fig. 3A, the mRNA expression of PMP22 was dramatically elevated in  
133 VP1-overexpressing MSCs compared with GFP-transfected cells. Immunofluorescent  
134 staining assay also showed similar results (Fig. 3B). These data indicate that VP1 is  
135 an upstream regulator of PMP22, suggesting a possible involvement of PMP22 in  
136 VP1-mediated activation of MSC autophagy.

137 *PMP22 is essential for MSC autophagy.*

138 We next sought to investigate whether PMP22 is involved in MSC autophagy. PMP22  
139 was knocked down by siRNA, which was confirmed by markedly decreased  
140 expression of PMP22 in siPMP22-transfected MSCs (Fig. 4A). Importantly,  
141 compared with siCtrl-transfected groups, knockdown of PMP22 significantly  
142 downregulated the expression of LC3 isoform LC3B-II, a gold standard autophagy  
143 marker (38), as shown in Fig. 4B and 4C. Consistently, the ratio of LC3B-II to  
144 LC3B-I in PMP22-deficient MSCs was also significantly lower than that in siCtrl-  
145 transfected groups (Fig. 4D). Furthermore, TEM images showed that there was no  
146 observable autophagic structure in siPMP22-transfected MSCs as compared with  
147 siCtrl-transfected cells (Fig. 5). Taken together, these data suggest that PMP22 is  
148 required for activation of autophagy in MSCs.

149 *ER stress mediates PMP22 expression in MSCs.*

150 Since PMP22 is closely associated with ER stress and both PMP22 and ER stress are  
151 essential for activation of autophagy, we further sought to clarify the relationship  
152 between PMP22 and ER stress in MSCs using selective ER stress inhibitor SAL. As  
153 shown in Fig. 6A, compared with the control groups, mRNA expression of PMP22  
154 was significantly downregulated following SAL treatment. Consistently, markedly  
155 weak fluorescent staining of PMP22 was also observed in SAL-treated MSCs (Fig.  
156 6B), suggesting that PMP22 expression in MSCs is mediated by ER stress. These  
157 results indicate that VP1/ER stress/PMP22 signaling axis is an important component  
158 in MSC autophagy.

159

## 160 **Discussion**

161 In the present study, we investigated the role and mechanism of EV71 capsid protein  
162 VP1 in MSC autophagy, and demonstrated for the first time that VP1 promotes MSC  
163 autophagy through ER stress-mediated PMP22 upregulation, suggesting VP1/ER  
164 stress/PMP22 axis as a novel potential target against EV71-induced neuronal disorder  
165 in severe HFMD cases.

166 EV71 possesses four structural proteins including VP1, VP2, VP3, and VP4. VP1  
167 homodimers are the main component of the characteristic icosahedral capsid  
168 contributing to the pathogenicity and stability of EV71 virus to survive in the  
169 environment of the gastrointestinal tract(39, 40). In the present study, we  
170 demonstrated that VP1 plays a promotive role in MSC autophagy (Fig. 2), which is  
171 consistent with our previous findings(25). However, the effect of VP1-induced  
172 autophagy on MSC survival still remains unclear because autophagy plays dual roles  
173 in the nervous system. Excessive autophagy may be protective in chronic  
174 neurodegenerative diseases but detrimental in acute neural damages(18, 41). It has



175 been reported that inhibition of EV71-induced autophagy in human  
176 rhabdomyosarcoma cells inhibits cell apoptosis at autophagosome formation stage  
177 and autophagy execution stage, but promotes apoptosis at the autophagosome-  
178 lysosome fusion stage. Furthermore, the inhibition of autophagy in the autophagosome  
179 formation stage or apoptosis decreases the release of EV71 viral particles, which is an  
180 effective strategy against virus infection(42). On the other hand, EV71-induced  
181 autophagy promotes viral replication in human rhabdomyosarcoma and  
182 neuroblastoma cells, and aggravates physiopathological parameters including weight  
183 loss, disease symptoms, and mortality in mouse models(23, 24). Further *in vitro* and  
184 *in vivo* studies are required to clarify the exact role of VP-induced autophagy in  
185 neuron cells.

186 In the present study, we also found that VP1 overexpression upregulated an important  
187 ER stress-associated protein PMP22(35, 36) in MSCs (Fig. 3), suggesting an  
188 involvement of ER stress activation in VP1-induced autophagy. It is well-established  
189 that excessive or premature PMP22 retaining in the ER induces ER stress(35, 36).  
190 However, the effect of ER stress activation on PMP22 expression hasn't been  
191 investigated yet. Our data revealed for the first time that inhibition of ER stress  
192 significantly downregulated the expression of PMP22 in MSCs (Fig. 6), suggesting  
193 that PMP22 is a downstream effector of ER stress. It seems that there is a positive  
194 feedback loop between ER stress and PMP22 in MSCs. Furthermore, our results  
195 showed that, in PMP22-deficient MSCs, there was no morphological signs of  
196 autophagy and the autophagy marker LC3B-II was remarkably downregulated (Fig. 4  
197 and 5), suggesting that PMP22 is essential for MSC autophagy. Interestingly, in an  
198 EV71-infected mouse model, VP1 was found co-localized with LC3 and/or  
199 autophagosome-like vesicles in neurons, and VP1 expression was positively

200 correlated with LC3-II expression, aggregation and autophagosome formation(24).  
201 Upregulation of LC3-II expression was also observed in VP1-transfected HEK293  
202 cells(25). Considering the regulatory role of VP1 in both MSC autophagy and PMP22  
203 expression (Fig. 3), we conclude that VP1/ER stress/PMP22 pathway may play an  
204 important role in activation of MSC autophagy.  
205 In summary, our data demonstrated that MSC autophagy can be activated by EV71  
206 capsid protein VP1. Mechanistically, the expression of ER stress-associated protein  
207 PMP22 was significantly upregulated by VP1, suggesting that ER stress-mediated  
208 PMP22 upregulation is possibly responsible for VP1-induced autophagy activation.  
209 The VP1/ER stress/PMP22 axis may serve as a potential therapeutic target against  
210 EV71 infection.

211

## 212 **Materials and Methods**

### 213 *Cell line and culture*

214 Mouse Schwann cells (MSC) were purchased from ScienCell Research Laboratories  
215 (Carlsbad, CA, USA) and maintained in Schwann cell medium (ScienCell) containing  
216 penicillin (100U/mL)/ streptomycin (100 µg/mL) (Hyclone, Logan, UT, USA) in  
217 poly-L-lysine-coated (2 µg/cm<sup>2</sup>) flasks at 37°C in a humidified atmosphere of 5%  
218 CO<sub>2</sub>.

### 219 *Sample collection*

220 EV71 were isolated from clinical specimens including throat, anal swabs and stools of  
221 HFMD patients with EV71 infection, and were provided by the Center for Disease  
222 Control and Prevention of Guangdong Province (Guangzhou, Guangdong, China).  
223 The patient was diagnosed by Guangxi Medical University (Nanning, Guangxi, China)

224 based on the pathological analysis by Forensic Identification Center, Zhongshan  
225 School of Medicine, Sun Yat-sen University (Guangzhou, Guangdong, China).

#### 226 *Gene cloning and transfection*

227 Total RNA was extracted from EV71 using Trizol (Invitrogen, Carlsbad, CA, USA).  
228 The 894-bp VP1 cDNA was synthesized by reverse transcription polymerase chain  
229 reaction (RT-PCR) using the primer sets 5'-  
230 CCGCTCGAGGCCACCATGGGTGATGGAATTGCAGACATGA-3' (forward) and  
231 5'-CGCGGATCCTAGTGTTGTTATTTGTCCCTACTTGTGC-3' (reverse)  
232 (Genewiz, Suzhou, Jiangsu, China). The PCR products were then subcloned into  
233 pEGFP-C3 (Green Fluorescent Protein, GFP) expression vector (Clontech, Terra.,  
234 USA) and sequencing was performed by Sangon Biotech (Shanghai, China). The  
235 results were compared with VP1 cDNA sequence reported by GenBank database.  
236 Cells were transiently transfected with plasmids using Lipofectamine 2000  
237 (Invitrogen) following the manufacturer's instruction.

#### 238 *Small interfering RNA (siRNA)*

239 siRNA against PMP22 (siPMP22) was from Santa Cruz Biotechnology (Dallas, TX,  
240 USA) and transfected using siRNA transfection reagent (Santa Cruz Biotechnology).  
241 Scramble siRNA (siCtrl) was used as a negative control.

#### 242 *Quantitative real-time PCR (qPCR)*

243 Total RNA was extracted from cells using Trizol (Invitrogen) following the  
244 manufacturer's instructions and was reversely transcribed into cDNA using reverse  
245 transcriptase (Promega, Madison, WI, USA). Real-time PCR was performed using  
246 SYBR Green qPCR SuperMix (Invitrogen) and the primers as shown in Table 1,  
247 following the manufacturer's instruction. GAPDH was used as an internal control.  
248 Data were analyzed using the  $2^{-\Delta\Delta Ct}$  method.

249 *Western blot analysis*

250 MSCs were lysed and the lysates were collected. Protein concentration was  
251 determined using BCA protein assay reagent (?). 50 ng of proteins were separated by  
252 10% SDS-PAGE gel and transferred to polyvinylidene fluoride membranes. The  
253 membranes were then blocked with 5% nonfat milk powder in Tris-buffered saline  
254 and Tween 20 (TBST), and then incubated with anti-GAPDH (1:1000; Abcam,  
255 Cambridge, UK) or anti-LC3B (1:1000; Abcam) for 1–2 h at room temperature.  
256 Following 3 washes with cold TBST, the membranes were incubated with peroxidase-  
257 conjugated secondary antibody (1:4000; Thermo Fisher Scientific, Rockford, IL  
258 61105 USA) for additional 1 h at room temperature. After 3 washes with TBST, the  
259 protein expression was detected using enhanced chemiluminescent development  
260 reagent (GE Healthcare, Little Chalfont, UK) and X-ray films.

261 *Immunofluorescence staining*

262 MSCs were seeded on sterile coverslips 48 h after transfection and incubated  
263 overnight at 37 °C. Cells were then fixed with 4% paraformaldehyde for 30 min,  
264 followed by incubation with 0.2% Triton-X 100 at 4 °C for 5 min. After phosphate-  
265 buffered saline (PBS) washes, cells were blocked with 10% normal goat serum  
266 (Jackson ImmunoResearch, West Grove, PA, USA) for 30 min and incubated with  
267 anti-PMP22 antibody (Abcam) overnight at 4 °C. Cells were then incubated with  
268 fluorescence-conjugated secondary antibodies (Thermo Fisher Scientific, Waltham,  
269 MA, USA) for 1 h at room temperature. The images of stained cells were captured  
270 with a Leica camera (Leica, Wetzlar, Germany).

271 *Transmission electron microscopy (TEM) analysis*

272 MSCs were prefixed with 2.5% glutaraldehyde for 2 h and postfixied with 1% osmic  
273 acid for additional 2 h at 4 °C, followed by gradient dehydration in 30%, 50%, and 70%

274 ethanol (10 min each), 80%, 90%, and 95% acetone (10 min each), and 100% acetone  
275 (10 min twice). Cells were then embedded in the resin and stained with lead citrate.  
276 The stained cells were observed and imaged under a Hitachi H-7500 transmission  
277 electron microscope (Hitachi, Tokyo, Japan).

#### 278 *Statistical analysis*

279 All experiments were repeated at least three times. Data were expressed as the mean  $\pm$   
280 standard error (SE). Statistical significance was assessed using Student's *t* test or one-  
281 way ANOVA with SPSS16.0 statistical software (SPSS Inc, IL, USA).  $P < 0.05$  was  
282 considered statistically significant.

283

#### 284 **Acknowledgements**

285 None

286

#### 287 **Conflict of interests**

288 All authors declare that they have no conflict of interests.

289

290

## 291 **References**

- 292 1. **Liu MY, Liu J, Lai W, Luo J, Liu Y, Vu GP, Yang Z, Trang P, Li H, Wu J.** 2016.  
293 Characterization of enterovirus 71 infection and associated outbreak of Hand, Foot,  
294 and Mouth Disease in Shawo of China in 2012. *Sci Rep* **6**:38451.
- 295 2. **Wang Y, Zou G, Xia A, Wang X, Cai J, Gao Q, Yuan S, He G, Zhang S, Zeng M,**  
296 **Altmeyer R.** 2015. Enterovirus 71 infection in children with hand, foot, and mouth  
297 disease in Shanghai, China: epidemiology, clinical feature and diagnosis. *Viol J* **12**:83.
- 298 3. **Aswathyraj S, Arunkumar G, Alidjinou EK, Hober D.** 2016. Hand, foot and mouth  
299 disease (HFMD): emerging epidemiology and the need for a vaccine strategy. *Med*  
300 *Microbiol Immunol* **205**:397-407.
- 301 4. **Shimizu H, Nakashima K.** 2014. Surveillance of hand, foot, and mouth disease for a  
302 vaccine. *Lancet Infect Dis* **14**:262-263.
- 303 5. **Zhang Y, Tan XJ, Wang HY, Yan DM, Zhu SL, Wang DY, Ji F, Wang XJ, Gao YJ, Chen L,**  
304 **An HQ, Li DX, Wang SW, Xu AQ, Wang ZJ, Xu WB.** 2009. An outbreak of hand, foot,  
305 and mouth disease associated with subgenotype C4 of human enterovirus 71 in  
306 Shandong, China. *J Clin Virol* **44**:262-267.
- 307 6. **Chong CY, Chan KP, Shah VA, Ng WY, Lau G, Teo TE, Lai SH, Ling AE.** 2003. Hand,  
308 foot and mouth disease in Singapore: a comparison of fatal and non-fatal cases. *Acta*  
309 *Paediatr* **92**:1163-1169.
- 310 7. **Sabanathan S, Tan le V, Thwaites L, Wills B, Qui PT, Rogier van Doorn H.** 2014.  
311 Enterovirus 71 related severe hand, foot and mouth disease outbreaks in South-East  
312 Asia: current situation and ongoing challenges. *J Epidemiol Community Health*  
313 **68**:500-502.
- 314 8. **Solomon T, Lewthwaite P, Perera D, Cardoso MJ, McMinn P, Ooi MH.** 2010.  
315 Virology, epidemiology, pathogenesis, and control of enterovirus 71. *Lancet Infect*  
316 *Dis* **10**:778-790.
- 317 9. **Gui J, Liu Z, Zhang T, Hua Q, Jiang Z, Chen B, Gu H, Lv H, Dong C.** 2015.  
318 Epidemiological Characteristics and Spatial-Temporal Clusters of Hand, Foot, and  
319 Mouth Disease in Zhejiang Province, China, 2008-2012. *PLoS One* **10**:e0139109.
- 320 10. **Xing WJ, Liao QH, Viboud C, Zhang J, Sun JL, Wu JT, Chang ZR, Liu FF, Fang VJ,**  
321 **Zheng YD, Cowling BJ, Varma JK, Farrar JJ, Leung GM, Yu HJ.** 2014. Hand, foot, and  
322 mouth disease in China, 2008-12: an epidemiological study. *Lancet Infectious*  
323 *Diseases* **14**:308-318.
- 324 11. **Hsueh C, Jung SM, Shih SR, Kuo TT, Shieh WJ, Zaki S, Lin TY, Chang LY, Ning HC, Yen**  
325 **DC.** 2000. Acute encephalomyelitis during an outbreak of enterovirus type 71  
326 infection in Taiwan: report of an autopsy case with pathologic, immunofluorescence,  
327 and molecular studies. *Mod Pathol* **13**:1200-1205.
- 328 12. **Kuo RL, Kung SH, Hsu YY, Liu WT.** 2002. Infection with enterovirus 71 or expression  
329 of its 2A protease induces apoptotic cell death. *J Gen Virol* **83**:1367-1376.
- 330 13. **Li ML, Hsu TA, Chen TC, Chang SC, Lee JC, Chen CC, Stollar V, Shih SR.** 2002. The 3C  
331 protease activity of enterovirus 71 induces human neural cell apoptosis. *Virology*  
332 **293**:386-395.
- 333 14. **Yang SD, Li PQ, Li YM, Li W, Lai WY, Zhu CP, Tao JP, Deng L, Liu HS, Ma WC, Lu JM,**  
334 **Hong Y, Liang YT, Shen J, Hu DD, Gao YY, Zhou Y, Situ MX, Chen YL.** 2017. Clinical  
335 manifestations of severe enterovirus 71 infection and early assessment in a  
336 Southern China population. *BMC Infect Dis* **17**:153.
- 337 15. **Klionsky DJ.** 2007. Autophagy: from phenomenology to molecular understanding in  
338 less than a decade. *Nat Rev Mol Cell Biol* **8**:931-937.
- 339 16. **Mizushima N, Klionsky DJ.** 2007. Protein turnover via autophagy: implications for  
340 metabolism. *Annu Rev Nutr* **27**:19-40.

- 341 17. **Ebrahimi-Fakhari D, Wahlster L, Hoffmann GF, Kolker S.** 2014. Emerging role of  
342 autophagy in pediatric neurodegenerative and neurometabolic diseases. *Pediatr Res*  
343 **75**:217-226.
- 344 18. **Ginet V, Spiehlmann A, Rummel C, Rudinskiy N, Grishchuk Y, Luthi-Carter R, Clarke**  
345 **PG, Truttman AC, Puyal J.** 2014. Involvement of autophagy in hypoxic-excitotoxic  
346 neuronal death. *Autophagy* **10**:846-860.
- 347 19. **Lee JH, Yu WH, Kumar A, Lee S, Mohan PS, Peterhoff CM, Wolfe DM, Martinez-**  
348 **Vicente M, Massey AC, Sovak G, Uchiyama Y, Westaway D, Cuervo AM, Nixon RA.**  
349 2010. Lysosomal proteolysis and autophagy require presenilin 1 and are disrupted  
350 by Alzheimer-related PS1 mutations. *Cell* **141**:1146-1158.
- 351 20. **Klionsky DJ, Abdelmohsen K, Abe A, Abedin MJ, Abeliovich H, Acevedo Arozena A,**  
352 **Adachi H, Adams CM, Adams PD, Adeli K, Adhietty PJ, Adler SG, Agam G, Agarwal**  
353 **R, Aghi MK, Agnello M, Agostinis P, Aguilar PV, Aguirre-Ghiso J, Airoidi EM, Ait-Si-**  
354 **Ali S, Akematsu T, Akporiaye ET, Al-Rubeai M, Albaiceta GM, Albanese C, Albani D,**  
355 **Albert ML, Aldudo J, Algul H, Alirezaei M, Alloza I, Almasan A, Almonte-Beceril M,**  
356 **Alnemri ES, Alonso C, Altan-Bonnet N, Altieri DC, Alvarez S, Alvarez-Erviti L, Alves S,**  
357 **Amadoro G, Amano A, Amantini C, Ambrosio S, Amelio I, Amer AO, Amessou M,**  
358 **Amon A, An Z, et al.** 2016. Guidelines for the use and interpretation of assays for  
359 monitoring autophagy (3rd edition). *Autophagy* **12**:1-222.
- 360 21. **Tanida I, Ueno T, Kominami E.** 2008. LC3 and Autophagy. *Methods Mol Biol* **445**:77-  
361 88.
- 362 22. **Benito-Cuesta I, Diez H, Ordonez L, Wandosell F.** 2017. Assessment of Autophagy in  
363 Neurons and Brain Tissue. *Cells* **6**.
- 364 23. **Huang SC, Chang CL, Wang PS, Tsai Y, Liu HS.** 2009. Enterovirus 71-induced  
365 autophagy detected in vitro and in vivo promotes viral replication. *J Med Virol*  
366 **81**:1241-1252.
- 367 24. **Lee YR, Wang PS, Wang JR, Liu HS.** 2014. Enterovirus 71-induced autophagy  
368 increases viral replication and pathogenesis in a suckling mouse model. *J Biomed Sci*  
369 **21**:80.
- 370 25. **Hu DD, Mai JN, He LY, Li PQ, Chen WX, Yan JJ, Zhu WD, Deng L, Wei D, Liu DH, Yang**  
371 **SD, Yao ZB.** 2017. Glucocorticoids Prevent Enterovirus 71 Capsid Protein VP1  
372 Induced Calreticulin Surface Exposure by Alleviating Neuronal ER Stress. *Neurotox*  
373 *Res* **31**:204-217.
- 374 26. **Rashid HO, Yadav RK, Kim HR, Chae HJ.** 2015. ER stress: Autophagy induction,  
375 inhibition and selection. *Autophagy* **11**:1956-1977.
- 376 27. **Lin W, Popko B.** 2009. Endoplasmic reticulum stress in disorders of myelinating cells.  
377 *Nat Neurosci* **12**:379-385.
- 378 28. **Lee WS, Yoo WH, Chae HJ.** 2015. ER Stress and Autophagy. *Curr Mol Med* **15**:735-  
379 745.
- 380 29. **Cai Y, Arikath J, Yang L, Guo ML, Periyasamy P, Buch S.** 2016. Interplay of  
381 endoplasmic reticulum stress and autophagy in neurodegenerative disorders.  
382 *Autophagy* **12**:225-244.
- 383 30. **Zou X, Xu J, Yao S, Li J, Yang Y, Yang L.** 2014. Endoplasmic reticulum stress-mediated  
384 autophagy protects against lipopolysaccharide-induced apoptosis in HL-1  
385 cardiomyocytes. *Exp Physiol* **99**:1348-1358.
- 386 31. **Cheng X, Liu H, Jiang CC, Fang L, Chen C, Zhang XD, Jiang ZW.** 2014. Connecting  
387 endoplasmic reticulum stress to autophagy through IRE1/JNK/beclin-1 in breast  
388 cancer cells. *Int J Mol Med* **34**:772-781.
- 389 32. **Snipes GJ, Suter U, Welcher AA, Shooter EM.** 1992. Characterization of a novel  
390 peripheral nervous system myelin protein (PMP-22/SR13). *J Cell Biol* **117**:225-238.

- 391 33. **Pareek S, Suter U, Snipes GJ, Welcher AA, Shooter EM, Murphy RA.** 1993. Detection  
392 and processing of peripheral myelin protein PMP22 in cultured Schwann cells. *J Biol*  
393 *Chem* **268**:10372-10379.
- 394 34. **Ryan MC, Notterpek L, Tobler AR, Liu N, Shooter EM.** 2000. Role of the peripheral  
395 myelin protein 22 N-linked glycan in oligomer stability. *J Neurochem* **75**:1465-1474.
- 396 35. **Dickson KM, Bergeron JJ, Shames I, Colby J, Nguyen DT, Chevet E, Thomas DY,**  
397 **Snipes GJ.** 2002. Association of calnexin with mutant peripheral myelin protein-22  
398 ex vivo: a basis for "gain-of-function" ER diseases. *Proc Natl Acad Sci U S A* **99**:9852-  
399 9857.
- 400 36. **Hara T, Hashimoto Y, Akuzawa T, Hirai R, Kobayashi H, Sato K.** 2014. Rer1 and  
401 calnexin regulate endoplasmic reticulum retention of a peripheral myelin protein 22  
402 mutant that causes type 1A Charcot-Marie-Tooth disease. *Sci Rep* **4**:6992.
- 403 37. **Shibutani ST, Yoshimori T.** 2014. A current perspective of autophagosome  
404 biogenesis. *Cell Res* **24**:58-68.
- 405 38. **Barth S, Glick D, Macleod KF.** 2010. Autophagy: assays and artifacts. *J Pathol*  
406 **221**:117-124.
- 407 39. **Shi M, Zhou Y, Cao L, Ding C, Ji Y, Jiang Q, Liu X, Li X, Hou X, Peng H, Shi W.** 2013.  
408 Expression of enterovirus 71 capsid protein VP1 in *Escherichia coli* and its clinical  
409 application. *Braz J Microbiol* **44**:1215-1222.
- 410 40. **Lal SK, Kumar P, Yeo WM, Kar-Roy A, Chow VTK.** 2006. The VP1 protein of human  
411 enterovirus 71 self-associates via an interaction domain spanning amino acids 66-  
412 297. *Journal of Medical Virology* **78**:582-590.
- 413 41. **Puyal J, Ginet V, Grishchuk Y, Truttmann AC, Clarke PG.** 2012. Neuronal autophagy  
414 as a mediator of life and death: contrasting roles in chronic neurodegenerative and  
415 acute neural disorders. *Neuroscientist* **18**:224-236.
- 416 42. **Xi XY, Zhang XY, Wang B, Wang T, Wang J, Huang H, Wang JW, Jin Q, Zhao ZD.** 2013.  
417 The Interplays between Autophagy and Apoptosis Induced by Enterovirus 71. *Plos*  
418 *One* **8**.
- 419
- 420



421 **Figure legends**

422

423 **Figure 1. Cloning and identification of VP1 cDNA.** Agarose electrophoresis for  
424 intact (lane 1) and restriction enzyme-digested (lane 2) VP1 cDNA cloning vector  
425 pEGFP-C3 plasmids. M: DNA marker.

426

427

428 **Figure 2. The effect of VP1 overexpression on MSC autophagy.** MSCs were  
429 transfected with pEGFP-C3-VP1 plasmids for 48 h. Untransfected and pEGFP-C3-  
430 transfected cells were used as blank and negative controls, respectively. Representative  
431 transmission electron microscopic images depict subcellular structures of MSCs. N:  
432 nucleus, M: mitochondrion, L: lysosome, AP: autophagosome, AL: autolysosome,  
433 DV: degradation vesicles, GA: Golgi apparatus, ER: endoplasmic reticulum, SV:  
434 secretory vesicles. MSC, mouse Schwann cell.

435

436

437 **Figure 3. The effect of VP1 on PMP22 expression in MSCs.** MSCs were  
438 transfected with pEGFP-C3-VP1 plasmids for 48 h. Untransfected and pEGFP-C3-  
439 transfected cells were used as blank and negative controls, respectively. A. The mRNA  
440 expression of PMP22 was detected by qPCR. Data are expressed as the mean  $\pm$  SE;  
441 \*\*\* $P < 0.001$  vs. untransfected group;  $n = 3$ . B. Immunofluorescent staining for  
442 PMP22 in pEGFP-C3- or pEGFP-C3-VP1-transfected MSCs. GFP expression was  
443 used to monitor the transfection efficacy. Magnification: 400 $\times$ . MSC, mouse Schwann  
444 cell; SE, standard error.

445

446

447 **Figure 4. The effect of PMP22 knockdown on autophagy marker LC3B-II in**  
448 **MSCs.** MSCs were transfected with siPMP22. Untransfected and scramble siRNA-  
449 transfected cells were used as blank and negative controls, respectively. mRNA and  
450 proteins expression of LC3B were detected by real-time PCR (A) and Western blot  
451 assay (B), respectively. (C) Quantification of Western blot assay. (D) Ratio of LC3B-  
452 II to LC3B-I. Data are expressed as the mean  $\pm$  SE; \*\*\* $P < 0.001$  vs. untransfected  
453 group; n = 3. MSC, mouse Schwann cell; SE, standard error.

454

455

456 **Figure 5. The effect of PMP22 knockdown on cellular and subcellular**  
457 **morphology of MSCs.** MSCs were transfected with siPMP22 for 48 h. Untransfected  
458 and scramble siRNA-transfected cells were used as blank and negative controls (siCtrl),  
459 respectively. Representative transmission electron microscopic images depict  
460 subcellular structures of MSCs. N: nucleus, M: mitochondrion, L: lysosome, AP:  
461 autophagosome, AL: autolysosome, DV: degradation vesicles, GA: Golgi apparatus.  
462 MSC, mouse Schwann cell.

463

464

465 **Figure 6. The effect of ER stress activation on PMP22 expression in MSCs.** MSCs  
466 were treated with 15  $\mu$ M of selective ER stress inhibitor salubrinal (SAL) for 48 h.  
467 Untreated and DMSO-treated cells were used as blank and negative controls. (A) The  
468 mRNA level of PMP22 was detected by real-time PCR. Data are expressed as the  
469 mean  $\pm$  SEM; \*\*\* $P < 0.001$  vs. untransfected group; n = 3. (B) Immunofluorescent  
470 staining (red) for PMP22 in DMSO- or SAL-treated MSCs. Furo 8-AM in SAL

471 showed green fluorescence. Magnification: 400×. ER, endoplasmic reticulum; MSC,

472 mouse Schwann cell; SE, standard error.

473

474

**Table 1 Real-time PCR primers**

| Gene  | Forward primer (5'–3') | Reverse primer (5'–3') |
|-------|------------------------|------------------------|
| PMP22 | CTGCCAGCTCTTCACTCTCA   | GTTGACATGCCACTCACTGT   |
| GAPDH | GGCCTCCAAGGAGTAAGAAA   | GCCCCTCCTGTTATTATGG    |

**M1**

**1**

**2**

**M2**

**2000**

**1000**

**750**

**500**

**250**

**100**

**10000**

**8000**

**6000**

**5000**

**4000**

**3000**

**2000**

**1500**

**1000**

**500**

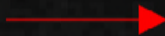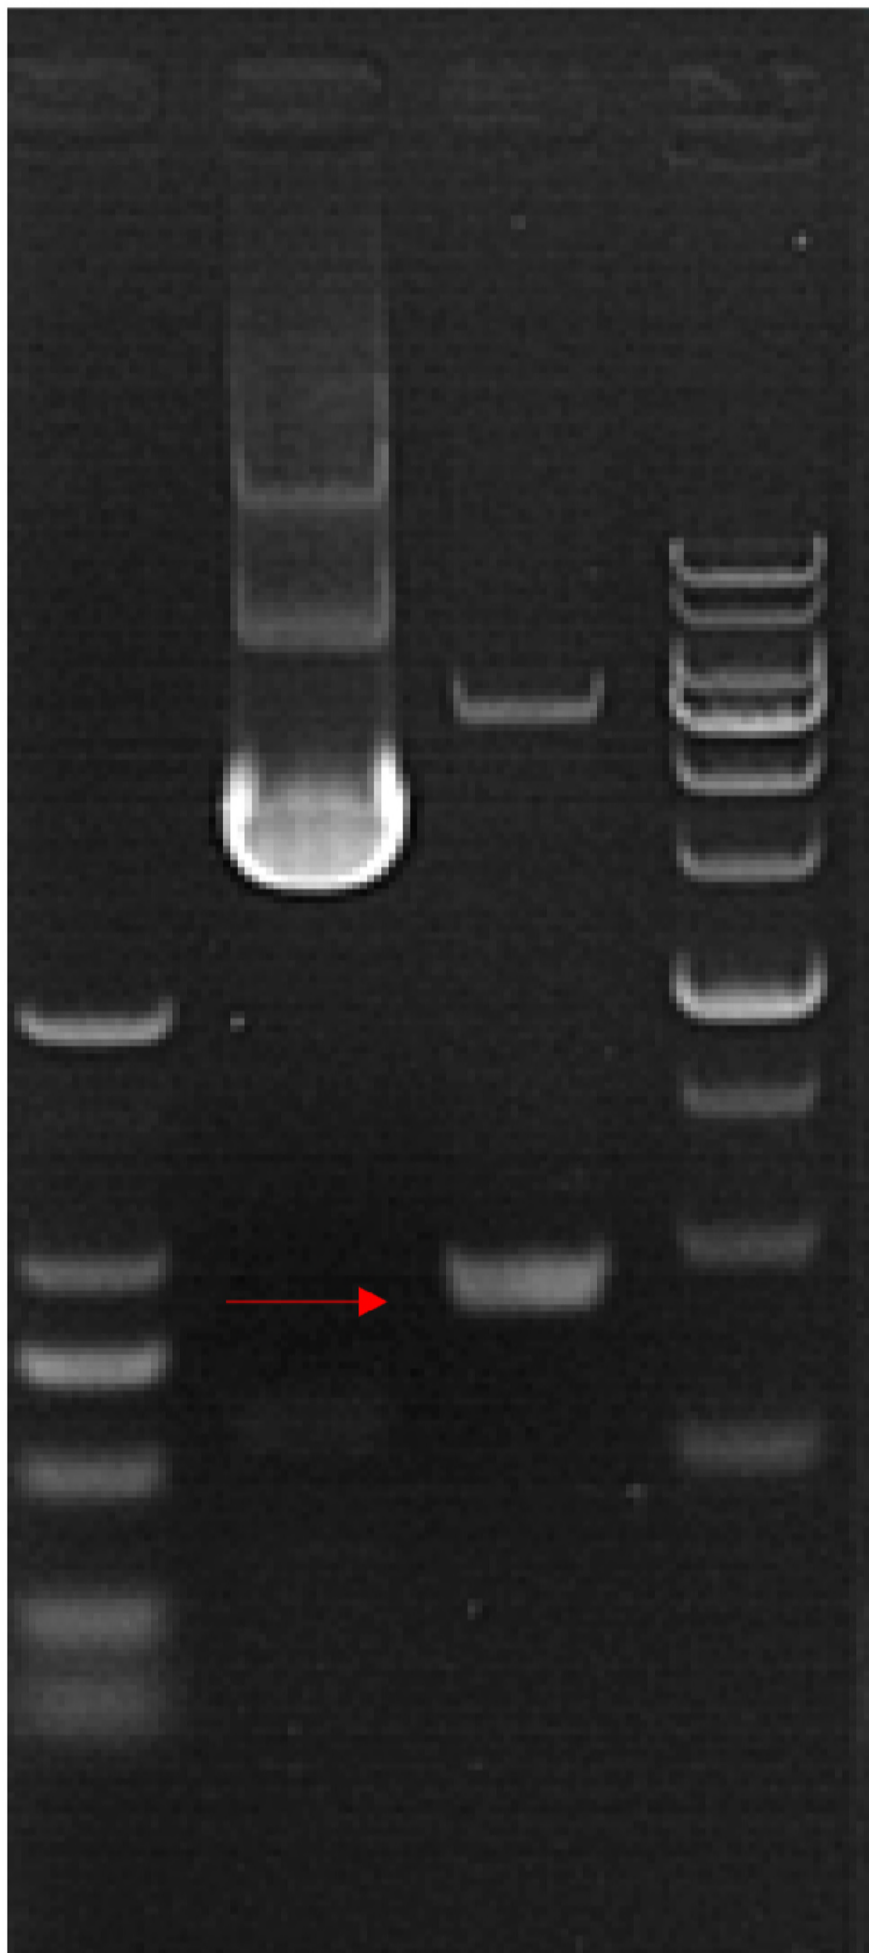

pEGFP-C3-transfected × 25000

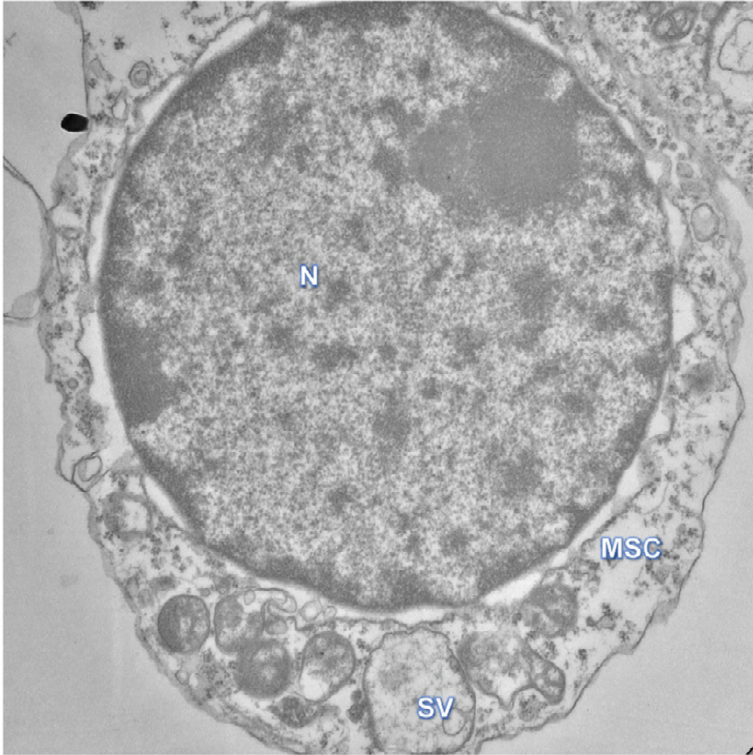

MSC

17073-16.tif  
Print Mag: 27200x @ 7.0 in  
10:12:58 3/8/2017

800 nm  
HV=80.0kV  
Direct Mag: 25000x  
AMT Camera System

Untransfected × 30000

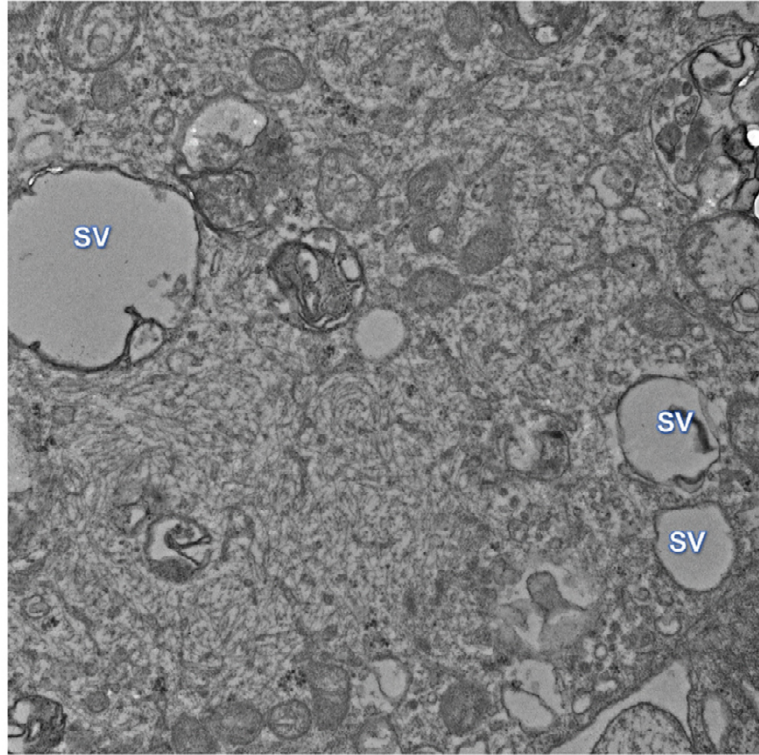

17032-18.tif  
Print Mag: 32500x @ 7.0 in  
16:32:45 3/2/2017

600 nm  
HV=80.0kV  
Direct Mag: 30000x  
AMT Camera System

×25000

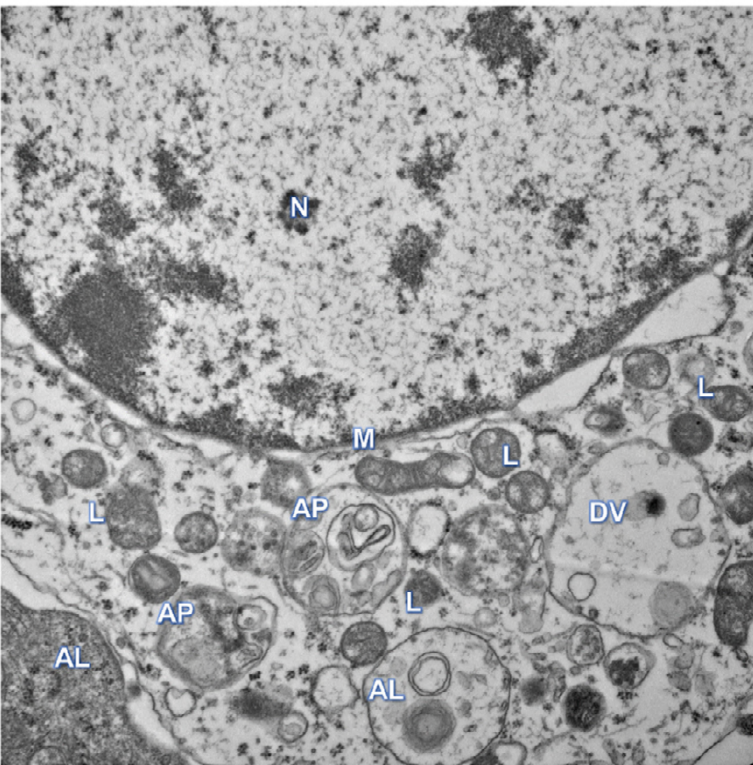

pEGFP-C3-VP1

17073-25.tif  
Print Mag: 27200x @ 7.0 in  
10:41:38 3/8/2017

800 nm  
HV=80.0kV  
Direct Mag: 25000x  
AMT Camera System

×30000

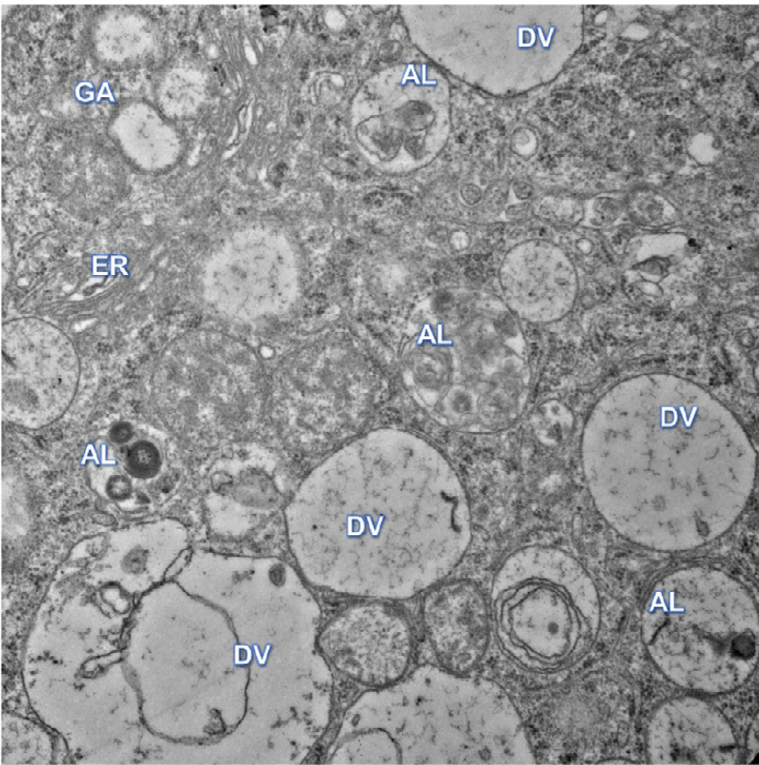

17032-33.tif  
Print Mag: 32900x @ 7.0 in  
08:24:53 3/3/2017

600 nm  
HV=80.0kV  
Direct Mag: 30000x  
AMT Camera System

**A**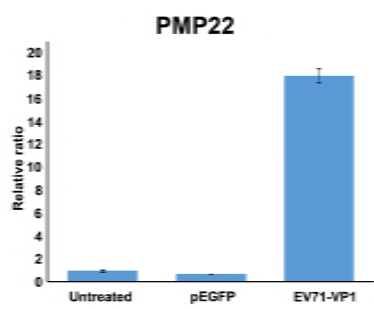**B**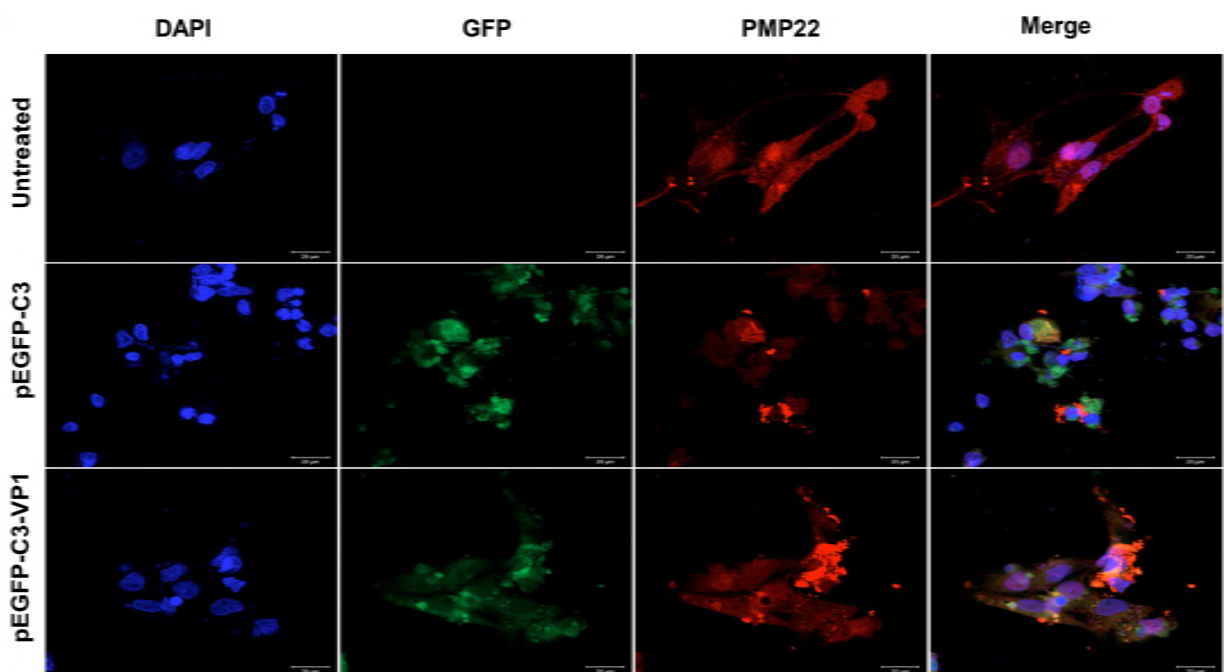

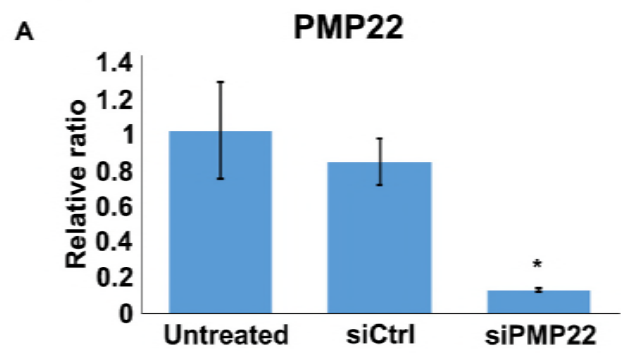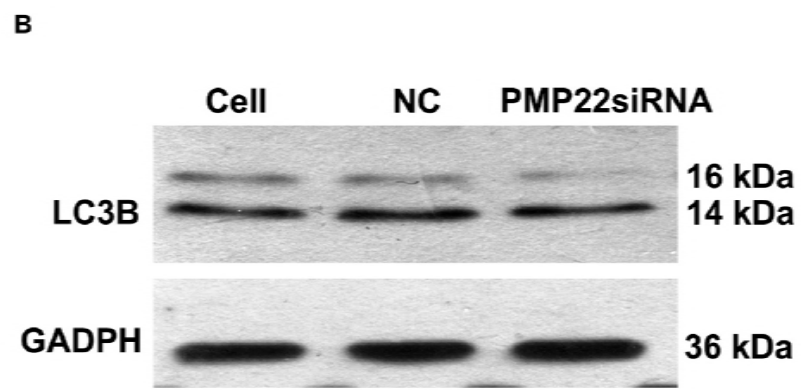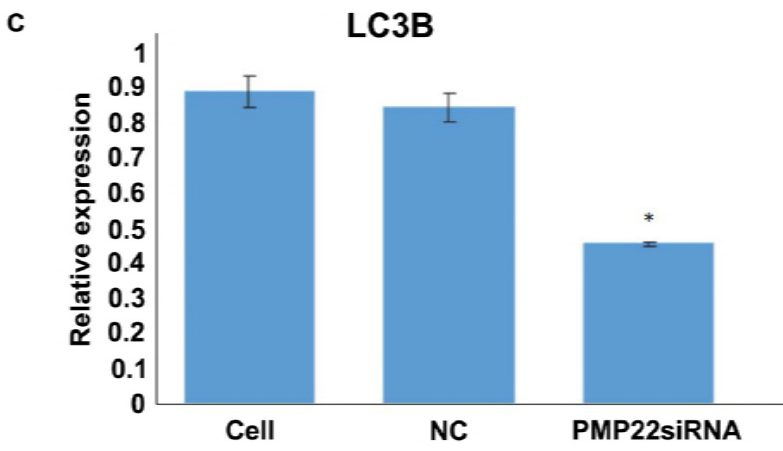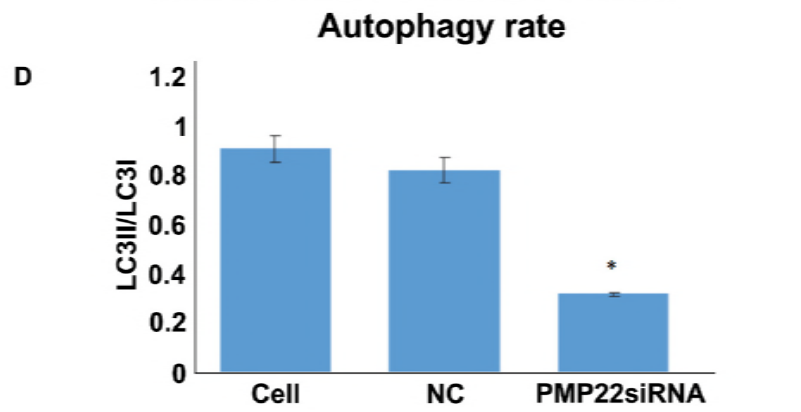

The gray level of anti-LC3B western blotting

The autophagy rate by detecting the gray level of anti-LC3B western blotting



×20000

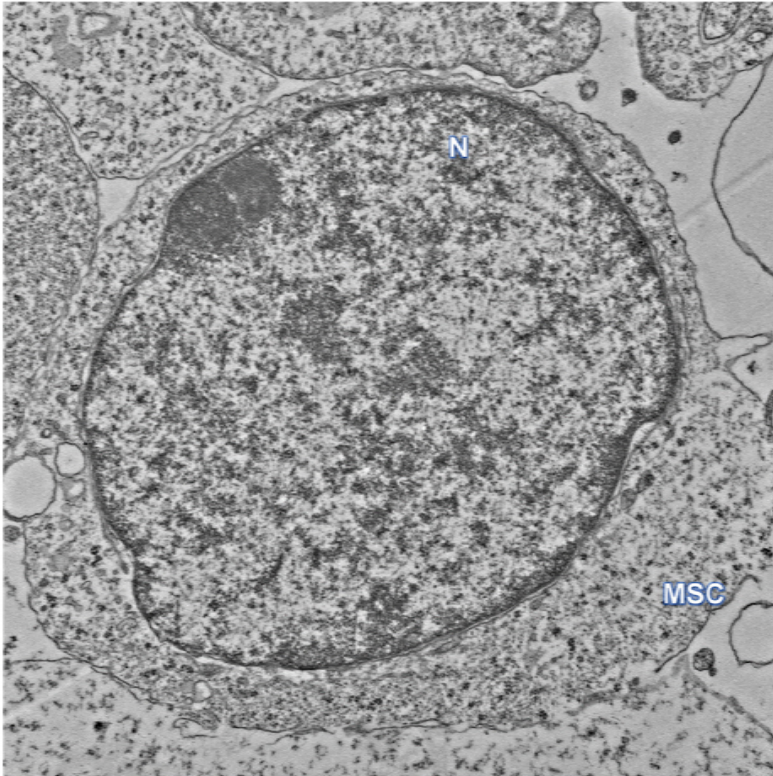

17032-6.tif  
Print Mag: 21700x @ 7.0 in  
16:13:56 3/2/2017

1 μm  
HV=80.0kV  
Direct Mag: 20000x  
AMT Camera System

×30000

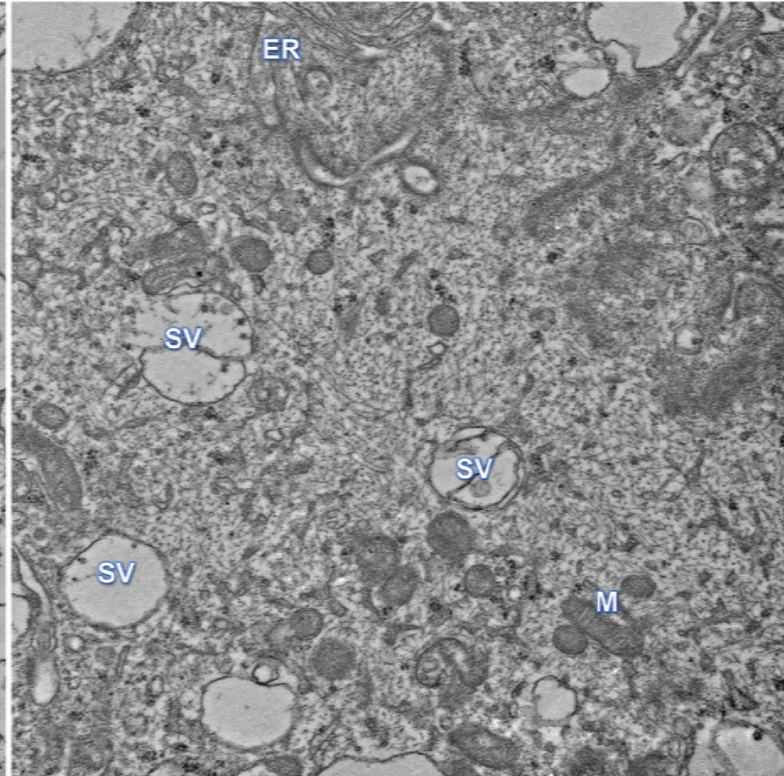

17032-17.tif  
Print Mag: 32900x @ 7.0 in  
16:31:23 3/2/2017

600 nm  
HV=80.0kV  
Direct Mag: 30000x  
AMT Camera System

siPMP22

**A**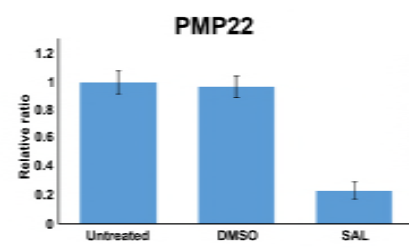**B**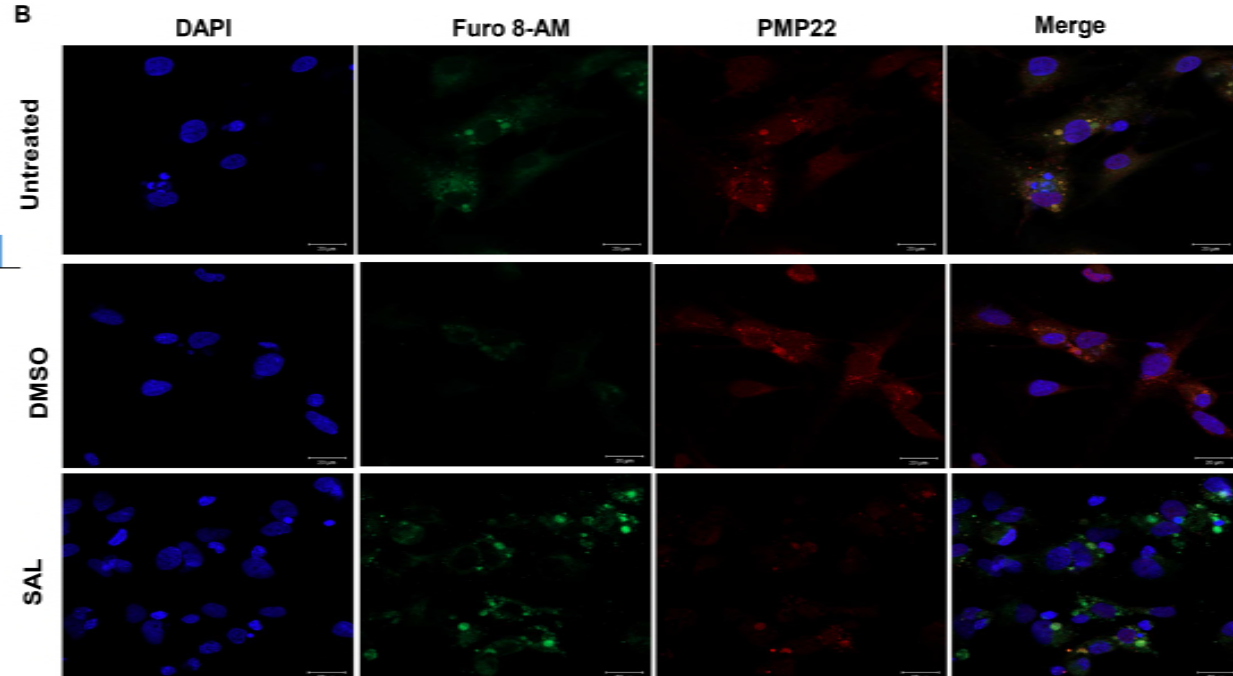

Source: https://www.biorxiv.org/content/10.1101/314468v1.full.pdf
